# Supplementary material for: Cyclopropyl fatty acids implicate a radical but not a cation as an intermediate in P450BM3-catalysed hydroxylations
Source: Royal Society of Chemistry journal article supplement (doi:10.1039/b315911f), 2004-01-01
Supplement: b315911f.doc [file b315911f.doc]

**General Methods** were performed as reported previously.1

**Compound Labelling.** *Number* only indicates the compound is the free acid. *Number plus letter ‘a’*  indicates the compound is the methyl ester.

**Silver nitrate chromatography.** Reagents were prepared in the absence of light using the following protocols: TLC plates were immersed in 10% w/v silver nitrate in acetonitrile solution before being oven dried for 1 h prior to use. Silica gel (10 g) was added to a solution of silver nitrate (1 g) in acetonitrile (10 mL) and stirred for 5 minutes before being dried under vacuum (1 Torr) for 3 h. Flash chromatography was then performed with the silica gel protected from light.

**Enzymatic Turnover with P450BM3.** Turnovers with all probes were performed in triplicate with two blanks using the following protocol: P450BM3 (12 L, 85 M, final concentration 2 M), fatty acid (25 L, 10 mM, final concentration 500 M) and superoxide dismutase (2.7 L, 37000 units mL-1, final concentration 20 units mL-1) were combined in pH 7.4 Kpi Buffer (100 mM) to a final volume of 500 L in a 1.5 mL vial. NADPH (3 L, 100 mM, final concentration 600 M) was added to the solution that was left to incubate for 1 hour at 37°C. Phenyl acetic acid (final concentration 50 M) was then added as an internal standard. The reaction was then acidified with 0.5 mL HCl (1M), extracted with diethyl ether (2 x 1mL) and esterified with diazomethane. The turnover mixtures were concentrated before being analysed by GC/MS. Blank turnovers were performed under identical conditions with the exception that either NADPH or P450BM3 was omitted.

**GC Analysis of Enzymic Turnover of 1.** Products from enzymic oxidation were converted to the corresponding methyl esters by treatment with diazomethane and the GC program for turnover analysis and standards **1a**, **3a**, **5a**, **7a**, **9a**, **11a** and **12a** on DB-WAX column: Splitless mode; Column Flow 1.4 mL / minute; Split Ratio 47; Total Flow 70.0 mL/min; Injector 200C; Detector 230C; Oven 40C (1.0 minutes equilibration) hold for 4.0 minutes, ramp 16C / minute to 230C and hold for 15.0 minutes, ramp 16C / minute to 250C and hold for 2.0 minutes (total program time 34.1 minutes).

**Standard and Turnover Retention** **Times [Characteristic MS Peaks]**: methyl *cis* 9-(2-propylcyclopropyl)-nonanoate **1a**: 10.91 minutes [m/z 222]; methyl *cis* 9-(2-(1-hydroxypropyl)-cyclopropyl)-nonanoate **3a**: *anti* 23.13 minutes, *syn* 23.85 minutes [m/z 169, 209, 241]; methyl 10-hydroxymethyltetradec-11-enoate **5a**: *trans* 30.03 minutes, *cis* 31.15 minutes [m/z 208, 240] ; methyl 10-hydroxypentadec-12-enoate **7a**: *trans* 23.83 minutes, *cis* 24.58 minutes [m/z 169, 201]; methyl *cis* 9-(2-(2-hydroxypropyl)-cyclopropyl)-nonanoate **9a**: 25.61 minutes [m/z 194]; methyl *trans* 9-(2-ethylcyclopropyl)-9-hydroxynonanoate **11a**: 23.22 minutes [m/z 172]; methyl *trans* 13-hydroxypentadec-10-enoate **12a**: 24.01 minutes [m/z 180]. Compounds **1a**, **3a**, *trans* **7a** and **9a** were present in the esterified products of enzymic turnover at identical retention times to standards; compounds **5a**, *cis* **7a**, **11a** and **12a** were not detected in the esterified products of enzymic turnover.

**GC Analysis of Enzymic Turnover of 2.** Products from enzymic oxidation were converted to the corresponding methyl esters by treatment with diazomethane and the GC Program for turnover analysis and standards **2a** & **4a** on DB-WAX column: Splitless mode; Column Flow 1.6 mL / minute; Split Ratio 39; Total Flow 67.4 mL/min; Injector 200C; Detector 230C; Oven 100C (1.0 minutes equilibration) hold for 2.0 minutes, ramp 16C / minute to 230C and hold for 15.0 minutes (total program time 25.1 minutes).

**Standard and Turnover Retention** **Times [Characteristic MS Peaks]**: methyl *cis* 11-(2-propylcyclopropyl)-undecanoate **2a**: 10.90 minutes [m/z 250]; methyl *cis* 11-(2-(1-hydroxypropyl)-cyclopropyl)-undecanoate **4a**: *anti* 16.28 minutes, *syn* 16.94 minutes [m/z 197, 237, 269]; methyl 12-hydroxymethylhexadec-13-enoate **6a**: Not Detected; methyl 12-hydroxyheptadec-14-enoate **8a**: *trans* 16.42 minutes [m/z 197]; methyl *cis* 11-(2-(2-hydroxypropyl)-cyclopropyl)-undecanoate **10a**: 17.75 minutes [m/z 222]. Compounds **2a** and **4a** were present in the esterified products of enzymic turnover at identical retention times to standards; compounds *trans* **8a** and **10a** were detected in the esterified products of enzymic turnover based on MS fragmentation peaks; compound **6a** and C16 compounds equivalent to cationic rearrangement products **11a** and **12a** were not detected in the esterified products of enzymic turnover.

*Methyl 10-hydroxymethyltetradec-11-enoate* **5a***:* **5a** was synthesised with the key step involving α-alkylation of 2-hexenal2 with 9-bromo-1-(tetrahydropyran-2’-yloxy)-nonane to afford the required carbon skeleton and thus **5a** following standard functional group manipulation as a mixture of *cis* and *trans* isomers (75% *cis* by NMR and GC). 1H NMR (400MHz, CDCl3)  0.95 (3H, t, *J*1 = 7.5 Hz), 1.20-1.60 (23H, m), 2.06 (2H, m), 2.28 (2H, t, *J*1 = 7.5 Hz), 2.57 (1H, m), 3.30, (1H, t, *J*1 = 9.3 Hz), 3.52 (1H, m), 3.64 (3H, s), 5.01 (0.75H, *cis*, d of d of t, *J*1 = 8.8 Hz, *J*2 = 8.3 Hz, *J*3 = 1.5 Hz), 5.11 (0.25H, *trans*, d of d of t, *J*1 = 21.0 Hz, *J*2 = 8.4 Hz, *J*3 = 1.5 Hz), 5.59 (1H, d of t, *J*1 = 11.7 Hz, *J*2 = 7.4 Hz). 13C NMR (100MHz, CDCl3)  14.0 *trans*, 14.5 *cis*, 21.1, 24.9, 27.1, 29.1, 29.2, 29.3, 29.6, 31.4, 34.1, 40.4, 51.4, 66.0 *trans*, 66.5 *cis*, 130.2 *trans*, 130.4 *cis*, 135.4 *cis*, 135.6 *trans*, 174.3. GC/MS: 252 (M+. -H2O, 2.0), 240 (8.5), 208 (23.0), 166 (16.4), 123 (16.3), 109 (22.9), 69 (70.7), 55 (100). Anal. Calcd. For C16H30O3: C, 71.07; H, 11.18. Found C, 71.07; H, 11.18.

*Methyl 10-hydroxypentadec-12-enoate* **7a***:* **7a** was synthesised from undec-10-en-1-ol with relevant terminal group manipulation and a Grignard/Wittig methodology to afford the required carbon skeleton and thus **7a** following standard functional group manipulation as a mixture of *cis* and *trans* isomers (75% *cis* by NMR and GC). 1H NMR (400MHz, CDCl3)  0.96 (3H, t, *J*1 = 7.5 Hz), 1.20-1.60 (15H, m), 2.03 (2H, d of t, *J*1 = 7.4 Hz, *J*2 = 6.0 Hz), 2.18 (2H, d of t, *J*1 = 7.3 Hz, *J*1 = 6.3 Hz), 2.27 (2H, t, *J*1 = 7.5 Hz), 3.58 (1H, m), 3.64 (3H, s), 5.36 (1H, m), 5.55 (1H, m). 13C NMR (100MHz, CDCl3)  13.8 *trans*, 14.2 *cis*, 24.9, 25.7, 29.1 (2C), 29.2, 29.4, 29.5, 34.1, 36.7, 40.7, 51.4, 70.9 *trans*, 71.4 *cis*, 124.5 *cis*, 124.8 *trans*, 135.1 *cis*, 136.2 *trans*, 174.3. GC/MS: 252 (0.3), 201 (15.4), 170 (8.5), 169 (78.8), 151 (4.7), 133 (8.5), 55 (98.7), 41 (100). Anal. Calcd. For C16H30O3: C, 71.07; H, 11.18. Found C, 70.93; H, 11.44.

*Methyl trans 9-(2-(1-hydroxypropyl)-cyclopropyl)-nonanoate* **3a**: **3a** was synthesised from *trans* 14-(tetrahydropyran-2’-yloxy)-tetradec-4-en-3-ol through cyclopropanation using Shi’s procedure3 to afford the required carbon skeleton and thus **3a** following standard functional group manipulation. 1H NMR (400MHz, CDCl3)  0.28 (1H, m), 0.35 (1H, m), 0.60 (2H, m), 0.94 (3H, t, *J*1 = 7.5 Hz), 1.19 (2H, t of d, *J*1 = 6.8 Hz, *J*2 = 2.6 Hz), 1.22-1.30 (11H, m), 1.57 (2H, quint, *J*1 = 7.2 Hz), 1.60 (2H, quint of d, *J*1 = 5.7 Hz, *J*2 = 2.0 Hz), 2.28 (2H, t, *J*1 = 7.5 Hz), 2.82 (1H, q of d, *J*1 = 5.6 Hz, *J*2 = 1.2 Hz), 3.64 (3H, s). 13C NMR (100MHz, CDCl3)  10.0, 10.1, 16.5, 25.0, 25.2, 27.0, 29.1, 29.4 (2C), 29.7, 29.9, 33.7, 34.1, 51.5, 77.7, 174.4. GC/MS: 269 (0.4), 252 (0.3), 241 (10.4), 209 (16.4), 173 (10.8), 169 (11.7), 149 (9.0), 41 (100).

Solvolysis of *cis* and *trans* *9-(2-(1-hydroxypropyl)-cyclopropyl)-nonanoic acid* **3:**

To a solution of either *cis* or *trans* **3** (5.0 mg, 24.7 μmol) stirring in acetone (5 mL) was added sequentially silver tetrafluoroborate (7.0 mg, 37.1 μmol) and trimethylsilyl chloride (4.0 mg, 37.1 μmol). The solution was allowed to stir for 24 h after which the reaction was acidified to pH 1 with HCl (1 M). The solution was then extracted with ethyl acetate (2 x 10 mL), washed with brine (10 mL) and the organic layer dried over MgSO4 and concentrated *in* *vacuo*. The residue was dissolved in diethyl ether (5 mL) and diazomethane solution (0.03M in diethyl ether) was added until the solution remained slightly yellow before being concentrated *in vacuo* to afford a mixture of products (5.0 mg). The residue was purified using silver nitrate flash chromatography (10% w/w silver nitrate on silica gel, 20% ethyl acetate in hexanes, r/f 0.38 cyclopropyl compounds, r/f 0.28 alkene compounds) to afford (for both *cis* and *trans* **3**) a mixture of *trans* cyclopropyl compounds **3a** and **11a** (2.0 mg) and a mixture of *trans* homoallylic alcohols **7a** and **12a** (3.0 mg).

Homoallylic alcohols *trans* **7a** and *trans* **12a**:

GC/MS: *trans* **7a** 252 (0.3), 201 (13.8), 169 (65.5), 133 (7.6), 123 (9.2), 81 (44.1), 55 (100), 41 (99.6); *trans* **12a** 252 (0.4), 221 (0.5), 212 (4.2), 180 (11.8), 138 (13.1), 96 (30.1), 59 (91.2), 41 (100).

HSQC & HMBC (1H 500MHz, 13C 125MHz, CDCl3):

*trans* **7a**

Arrows indicate selected HMBC connectivity.

| Signal No. |  13C |  1H | Signal No. |  13C |  1H |
| --- | --- | --- | --- | --- | --- |
| 1 | 51.44 | 3.64 | 9* | 29. 14 | 1.30 |
| 2 | 174.35 | --- | 10 | 36.70 | 1.43 |
| 3 | 34.10 | 2.27 | 11 | 70.90 | 3.55 |
| 4 | 24.93 | 1.59 | 12 | 40.67 | 2.04/2.22 |
| 5 | 29.45 | 1.45 | 13 | 124.82 | 5.379 |
| 6* | 29.10 | 1.25 | 14 | 136.27 | 5.581 |
| 7* | 29.17 | 1.25 | 15 | 25.67 | 2.02 |
| 8* | 29.37 | 1.25 | 16 | 13.82 | 0.97 |

* Assignments 6-9 are interchangeable within structure.

*trans* **12a**

Arrows indicate selected HMBC connectivity.

| Signal No. |  13C |  1H | Signal No. |  13C |  1H |
| --- | --- | --- | --- | --- | --- |
| 1 | 51.44 | 3.64 | 9* | 29.24 | 1.25 |
| 2 | 174.35 | --- | 10 | 32.63 | 2.00 |
| 3 | 34.10 | 2.27 | 11 | 134.68 | 5.535 |
| 4 | 24.93 | 1.59 | 12 | 125.84 | 5.384 |
| 5 | 29.45 | 1.45 | 13 | 40.19 | 2.04/2.22 |
| 6* | 25.65 | 1.42 | 14 | 72.26 | 3.49 |
| 7* | 29.06 | 1.25 | 15 | 29.57 | 1.45 |
| 8* | 29.18 | 1.25 | 16 | 9.95 | 0.93 |

* Assignments 6-9 are interchangeable within structure.

Cyclopropyl alcohols *trans* **3a** and *trans* **11a** (methyl esters):

GC/MS: *trans* **3a** 252 (0.3), 241 (3.9), 209 (6.4), 169 (14.6), 149 (7.2), 81 (31.3), 57 (67.7), 41 (100); *trans* **11a** 269 (0.1), 252 (0.2), 203 (0.5), 172 (7.7), 143 (5.2), 87 (19.1), 57 (100), 41 (57.6).

HSQC & HMBC (1H 750MHz, 13C 187.5MHz, CDCl3):

*trans* **3a**

Arrows indicate selected HMBC connectivity.

| Signal No. |  13C |  1H | Signal No. |  13C |  1H |
| --- | --- | --- | --- | --- | --- |
| 1 | 51.44 | 3.64 | 9* | 29. 68 | 1.23 |
| 2 | 174.36 | --- | 10 | 33.71 | 1.18 |
| 3 | 34.11 | 2.28 | 11 | 16.54 | 0.59 |
| 4 | 24.92 | 1.58 | 12 | 10.01 | 0.27/0.35 |
| 5* | 27.03 | 1.22 | 13 | 25.20 | 0.59 |
| 6* | 29.12 | 1.25 | 14 | 77.65 | 2.82 |
| 7* | 29.39 | 1.20 | 15 | 29.88 | 1.56 |
| 8* | 29.40 | 1.20 | 16 | 10.07 | 0.95 |

* Assignments 6-9 are interchangeable within structure.

*trans* **12a**

Arrows indicate selected HMBC connectivity.

| Signal No. |  13C |  1H | Signal No. |  13C |  1H |
| --- | --- | --- | --- | --- | --- |
| 1 | 51.44 | 3.64 | 9* | 31.93 | 1.22 |
| 2 | 174.36 | --- | 10 | 37.04 | 1.52 |
| 3 | 34.11 | 2.28 | 11 | 76.26 | 2.88 |
| 4 | 24.92 | 1.59 | 12 | 25.50 | 0.59 |
| 5* | 29.12 | 1.20 | 13 | 9.81 | 0.27/0.33 |
| 6* | 29.20 | 1.25 | 14 | 18.52 | 0.59 |
| 7* | 29.21 | 1.25 | 15 | 26.74 | 1.19/1.26 |
| 8* | 29.71 | 1.27 | 16 | 13.81 | 0.94 |

* Assignments 6-9 are interchangeable within structure.

**Bibliography:**

(1) Cryle, M. J.; Matovic, N. J.; De Voss, J. J. *Org. Lett.* **2003**, *5*, 3341-3344.

(2) Yamashita, M.; Matsumiya, K.; Nakano, K. *Bull. Chem. Soc. Japan* **1993**, *66*, 1759-63.

(3) Zhiqiang, Y.; Lorenz, J. C.; Shi, Y. *Tetrahedron Lett.* **1998**, *39*, 8621-8624.
